# Supplementary material for: Gene Therapy with Enterovirus 3 C Protease: A Promising Strategy for Various Solid Tumors
Source: Springer Nature journal article supplement (doi:10.1038/s41467-025-59440-8), 2025-05-08
Supplement: MOESM1 [file 41467_2025_59440_MOESM1_ESM.pdf]

## **Supplementary Information of Gene Therapy with Enterovirus 3C**

### **Protease: A Promising Strategy for Various Solid Tumors**

**Authors:** Xiaotong Yang<sup>1,2, #</sup>, Wei Li<sup>1, #</sup>, Shaokang Yang<sup>1, #</sup>, Zhuang Wang<sup>1</sup>, Jiye Yin<sup>3</sup>, Wenhao Zhang<sup>3</sup>, Huimin Tao<sup>1,2</sup>, Siqi Li<sup>1</sup>, Xiaojia Guo<sup>1</sup>, Qingsong Dai<sup>1</sup>, Weiyan Zhu<sup>1</sup>, Yuexiang Li<sup>1</sup>, Xintong Yan<sup>1,4</sup>, Chongda Luo<sup>1,4</sup>, Jiazheng Li<sup>1,4</sup>, Sichen Ren<sup>1,4</sup>, Ping Wang<sup>1,4</sup>, Yunfeng Shao<sup>1,4</sup>, Yan Luo<sup>1,4</sup>, Zhenyang Li<sup>1</sup>, Jingjing Yang<sup>1,4</sup>, Zhijie Chang<sup>2</sup>, Ruiyuan Cao<sup>1, \*</sup>, Song Li<sup>1,4 \*</sup>, Wu Zhong<sup>1, \*</sup>

#### **Affiliations:**

<sup>1</sup> National Engineering Research Center for the Emergency Drug, Beijing Institute of Pharmacology and Toxicology, Beijing 100850, China

<sup>2</sup> School of Basic Medical Sciences, Tsinghua University, Beijing 100084, China

<sup>3</sup> National Beijing Center for Drug Safety Evaluation and Research, Beijing Institute of Pharmacology and Toxicology, Beijing 100850, China

<sup>4</sup> Song Li's Academician Workstation of Hainan University (School of Pharmaceutical Sciences), Yazhou Bay, Sanya, 572000, China.

<sup>#</sup> These authors contributed equally to this work

<sup>\*</sup>Corresponding Authors:

Wu Zhong, E-mail: [zhongwu@bmi.ac.cn](mailto:zhongwu@bmi.ac.cn);

Song Li, E-mail: [lis.lisong@gmail.com](mailto:lis.lisong@gmail.com);

Ruiyuan Cao, E-mail: 21cc@163.com.

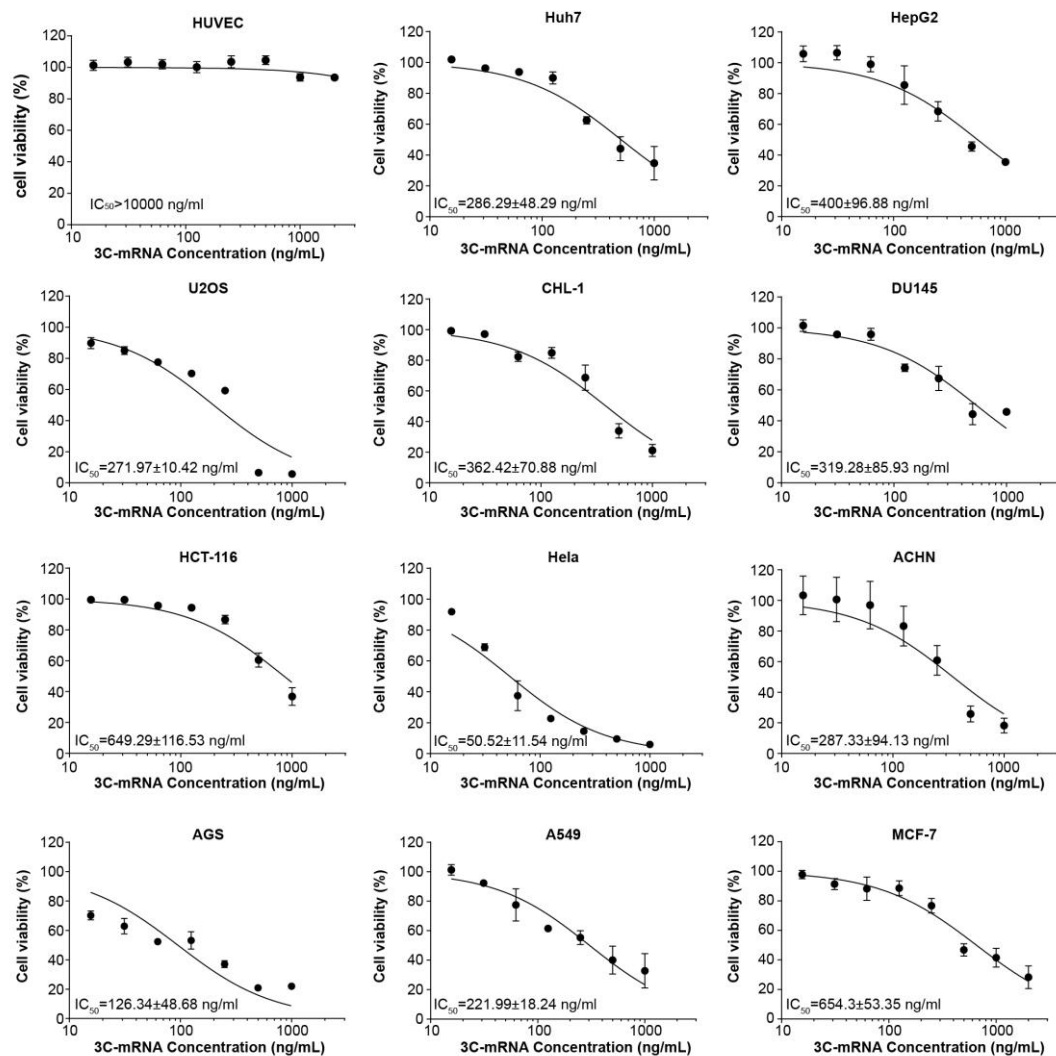

**Supplementary Fig. 1| 3C-mRNA has broad-spectrum antitumor activity *in vitro*.** Cell viability was assessed in the following cell lines after transfection with 3C-mRNA at 998.4 ng/mL, 499.2 ng/mL, 249.6 ng/mL, 124.8 ng/mL, 62.4 ng/mL, 31.2 ng/mL and 15.6 ng/mL: Huh7 and HepG2 hepatocellular carcinoma (HCC), U2OS osteosarcoma, CHL-1 melanoma, DU145 prostate cancer, HCT-116 human colorectal carcinoma, Hela cervical cancer, ACHN human renal adenocarcinoma, AGS gastric cancer and A549 lung cancer cells and Human umbilical vein endothelial cells (HUVECs) were used as a non-tumor control. The data are presented as the means  $\pm$  SDs.  $n=3$  independent biological samples. Source data are provided as a Source Data file.

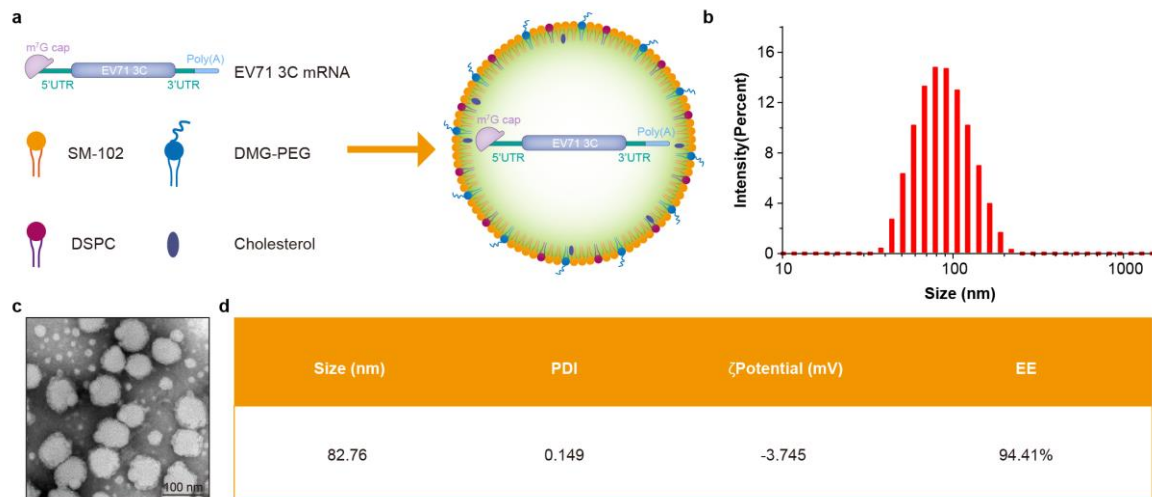

**Supplementary Fig. 2| Encapsulation and characterization of 3C-LNPs.** (a) Schematic illustration of the 3C-mRNA preparation. The molar ratio of the LNPs was SM-102: Distearoylphosphatidylcholine (DSPC): Cholesterol: Distearoylphosphatidyl ethanolamine-polyethylene glycol (DMG-PEG)=50:10:38.5:1.5. LNPs were produced by mixing an ethanol–lipid mixture with an mRNA in a sodium citrate acidizing buffer using a microfluidic mixer. (b) Representative intensity-size graph of 3C-LNPs measured by the dynamic light-scattering method. (c) Representative Cryo-TEM image of 3C-LNPs) from 3 independent experiments; scale bar, 100 nm. (d) The size, polymer dispersion index (PDI), zeta potential and encapsulation efficiency of 3C-LNPs were evaluated. The data are presented as the means  $\pm$  SDs of five independent preparations. Source data are provided as a Source Data file.

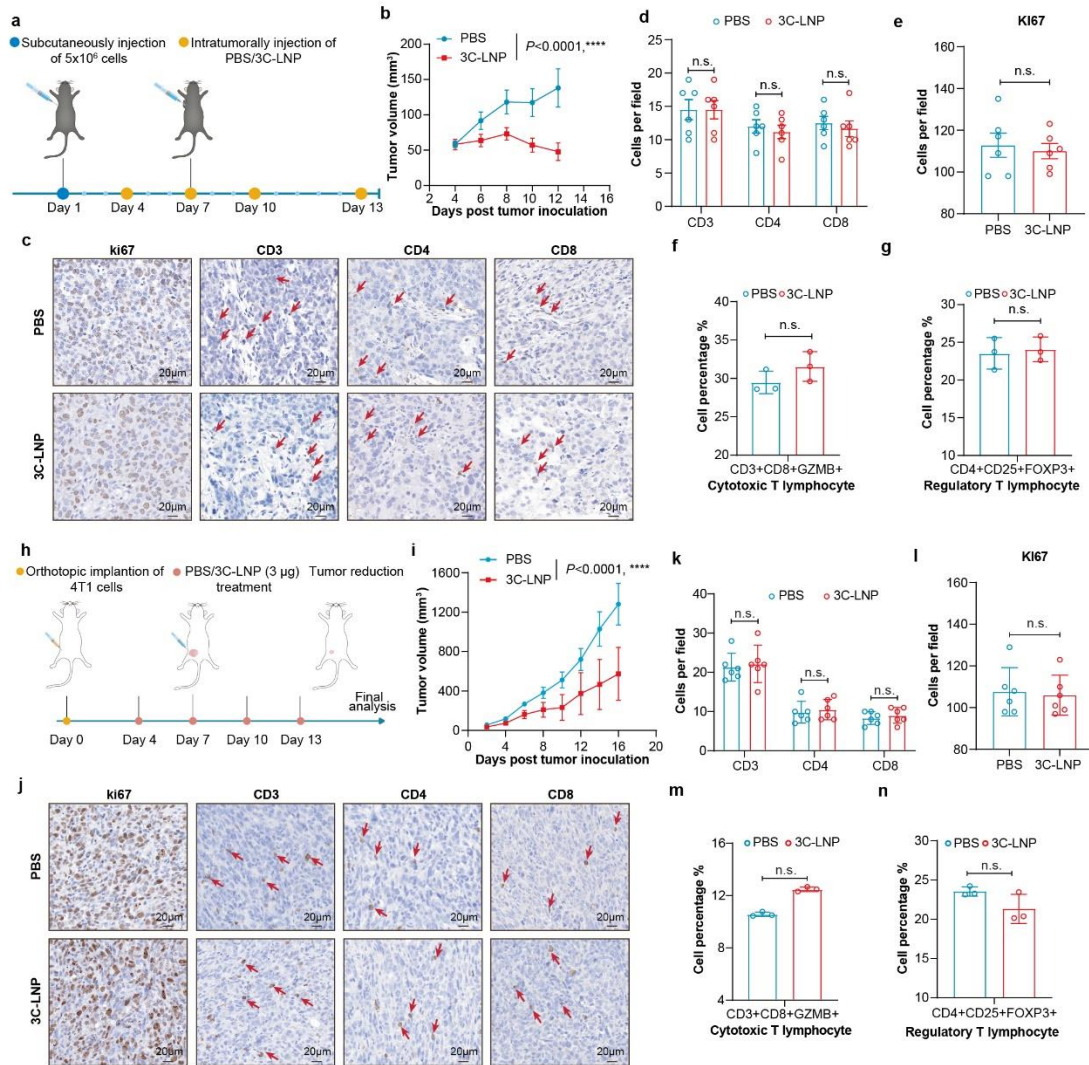

**Supplementary Fig. 3| The antitumor activity of 3C-LNPs is independent of T cell-mediated antitumor immune response.** (a) Timeline of tumor implantation and treatment schedule in the subcutaneous tumor model of C57BL/6 mice. Tumor-bearing mice were subcutaneously injected with PBS or 3C-LNPs (3  $\mu$ g) every 3 days for a total of four doses. (n=5 mice/group). (b) Tumor growth curves of the tumor-bearing mice after treatment with PBS or 3C-LNPs (n =5 mice/group). The data are presented as the means  $\pm$  SEMs. Statistical differences were assessed using Two-way ANOVA with the Bonferroni multiple comparisons test. \*\*\*\* $P < 0.0001$ . (c-e) and (j-l) Representative IHC staining images of tumor tissues from 3 mice/group, with quantification of CD3, CD4, and CD8+ T cells, as well as Ki-67, performed in six fields of view. The data are presented as the means  $\pm$  SDs. For (d) and (k) Statistical differences were assessed using multiple t tests. For (e) and (l) Statistical differences were assessed using an unpaired t test. n.s.= not significant. (f) and (m) Quantification of cytotoxic T lymphocytes. (g) and (n) Quantifications of regulatory T lymphocytes. The data are presented as the means  $\pm$  SDs. Statistical differences were assessed using an unpaired t test. n.s.=not significant. (h) Timeline of tumor implantation and treatment schedule in the 4T1 mammary fat pad tumor model of Balb/c mice. Mice were subcutaneously injected around the tumor tissues with PBS, or 3C-LNPs (3  $\mu$ g) every 3 days for a total of four doses (n=5 mice/group). (i) Tumor growth curves of the tumor-bearing mice after treatment with PBS or 3C-LNPs (n =5 mice/group). The data are presented as the means  $\pm$  SDs. Statistical differences were assessed using Two-way ANOVA with the Bonferroni multiple comparisons test. \*\*\*\* $P < 0.0001$ . Source data are provided as a Source Data file.

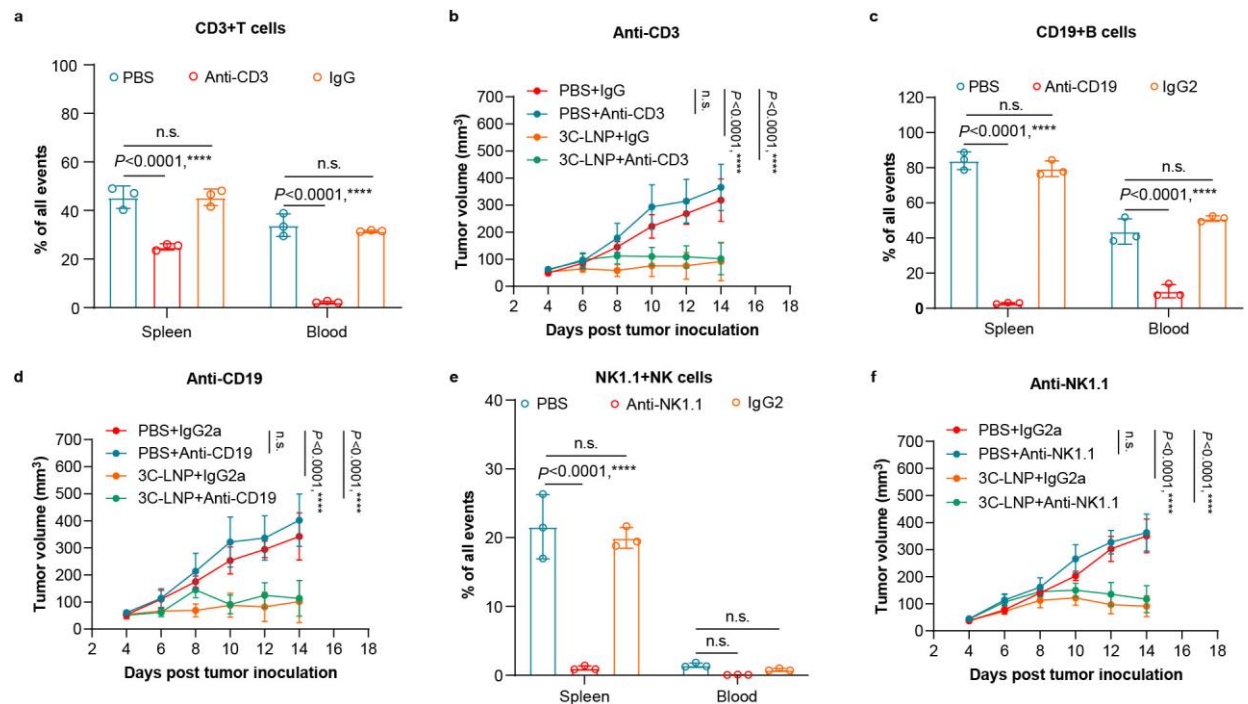

**Supplementary Fig. 4| The antitumor activity of 3C-LNPs is independent of tumor immune response.** Flow cytometry was employed to quantify the levels of (a) CD3<sup>+</sup> T cells, (c) CD19<sup>+</sup> B cells, and (e) NK1.1<sup>+</sup> NK cells in spleen and blood of mice subjected to depletion protocols, two weeks after the initiation of weekly intraperitoneal (i.p.) antibody injections. The data are presented as the means  $\pm$  SDs.  $n=6$  mice/group. Statistical differences were assessed using two-way ANOVA with the Bonferroni multiple comparisons test. n.s.=not significant. \*\*\*\* $P < 0.0001$ . (b), (d) and (f) Tumor growth curves of the tumor-bearing mice after treatment with PBS combined with antibodies, PBS combined with corresponding control IgG, 3C-LNP combined with antibodies, and 3C-LNP combined with corresponding control IgG ( $n=6$  mice/group). The data are presented as the means  $\pm$  SDs. Statistical differences were assessed using two-way ANOVA with the Bonferroni multiple comparisons test. n.s.=not significant. \*\*\*\* $P < 0.0001$ . Source data are provided as a Source Data file.

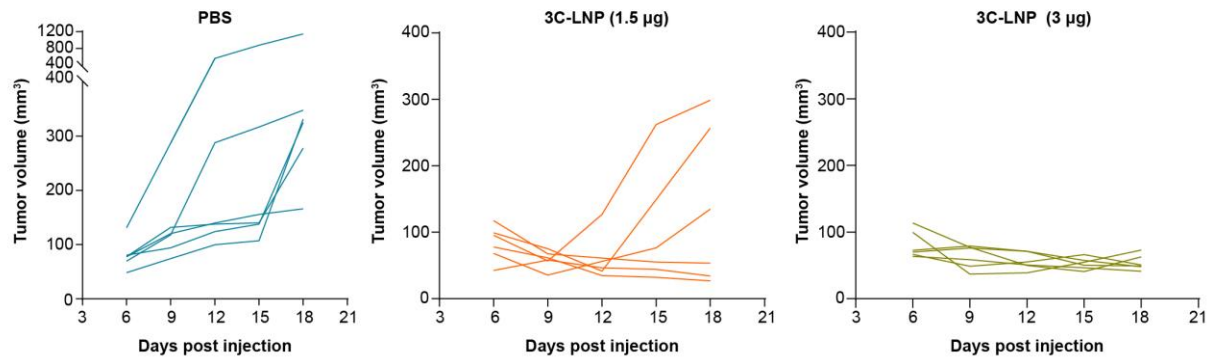

**Supplementary Fig. 5| Changes in tumor volume in individual mice with orthotopic breast cancer.** Growth curves of tumors from individual tumor-bearing mice after treatment with PBS, 3C-LNPs (1.5 µg), or 3C-LNPs (3 µg). n = 6 mice/group. Source data are provided as a Source Data file.

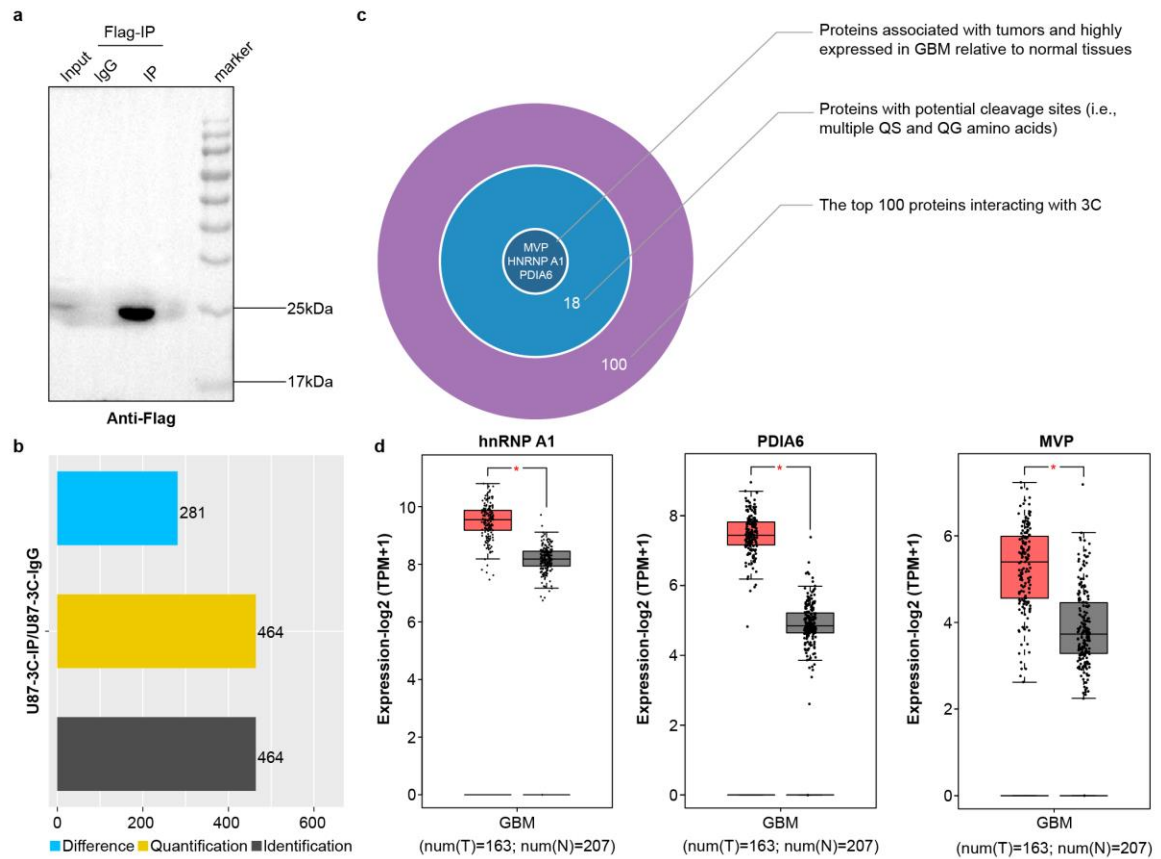

**Supplementary Fig. 6 | Differential abundance of hnRNP A1, PDIA6 and MVP in GBM cells.** (a) U87 MG cells were transfected with a FLAG-tagged 3C expression plasmid. FLAG-IP showed that the 3C protein was sufficiently enriched for subsequent mass spectrometry identification of interacting proteins. (b) A total of 464 proteins, 281 of which were differentially abundant, were identified in the U87-3C-IP and U87-3C-IgG groups. (c) We identified 3 proteins, hnRNP A1, PDIA6, and MVP from the top 100 proteins interacting with the 3C protein and with potential 3C<sup>pro</sup> cleavage sites. (d) Differential expression of hnRNP A1, PDIA6, and MVP in normal and GBM tumor tissues (Gene Expression Profiling Interactive Analysis database). T represents tumor tissue, N represents normal tissue. Source data are provided as a Source Data file.

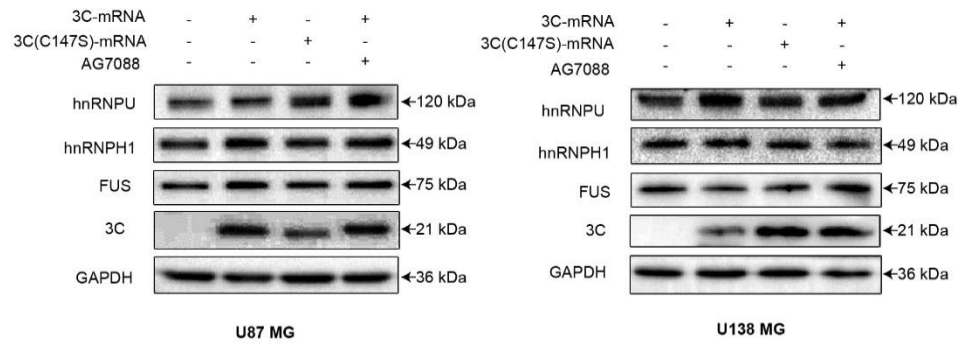

**Supplementary Fig. 7| 3C protease does not affect protein expression of hnRNPU, hnRNPH1 and FUS in GBM cells.** Representative western blot analysis of hnRNPU, hnRNPH1, FUS and 3C expression in U87 MG and U138 MG cells transfected with 3C-mRNA and 3C(C147S)-mRNA, and in cells transfected with 3C-mRNA and treated with AG7088 from 3 independent experiments. Source data are provided as a Source Data file.



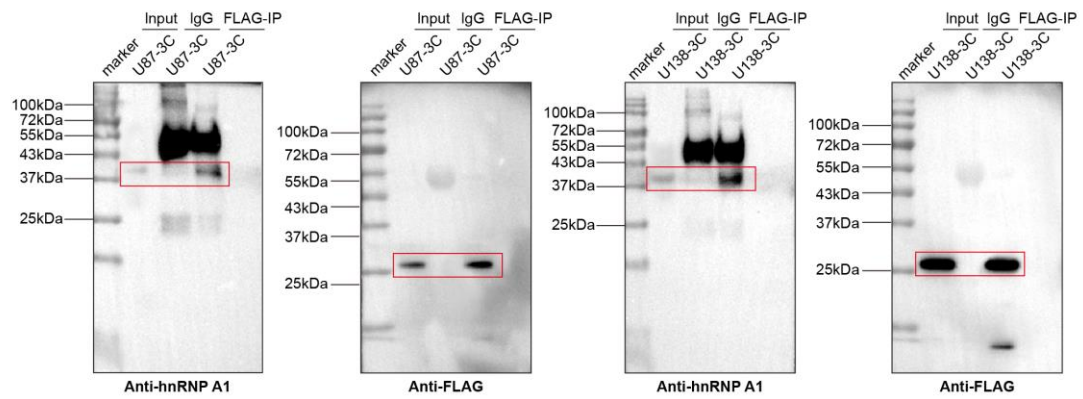

**Supplementary Fig. 8| 3C protease interacts with hnRNP A1 in glioblastoma cells.** Total protein from U87 MG and U138 MG cells transfected with a 3C-FLAG expression plasmid was used as the input in co-IP experiments. The FLAG-IP group comprises proteins that have coprecipitated with 3C-FLAG. Blots were incubated with anti-hnRNP A1 antibody.

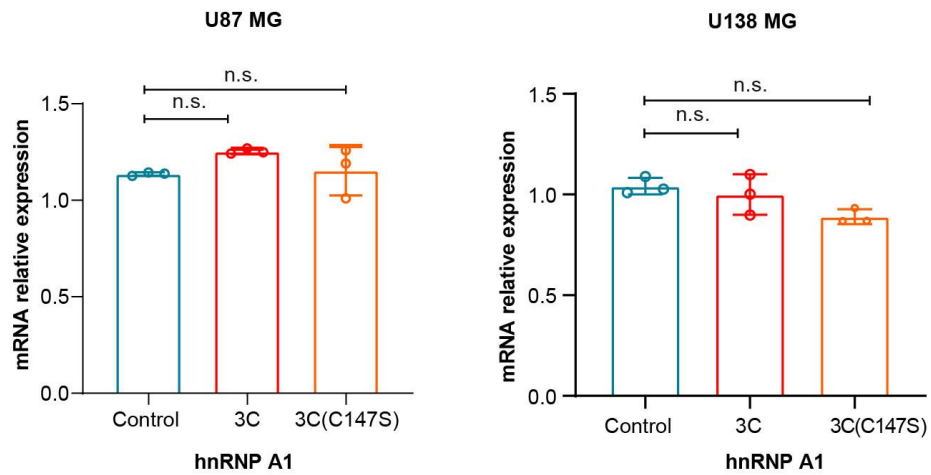

**Supplementary Fig. 9| mRNA expression levels of hnRNPA1 in U87 MG and U138 MG cells.** mRNA expression levels of hnRNPA1 in U87 MG and U138 MG cells following transfection with control (lipo2000), 3C-mRNA (3.5  $\mu$ g), and 3C(C147S)-mRNA (3.5  $\mu$ g). The mRNA relative expression was normalized to GAPDH and is presented as the mean  $\pm$  SD. n = 3 cell samples/group. Statistical differences were assessed using one-way ANOVA. n.s.=not significant. Source data are provided as a Source Data file.

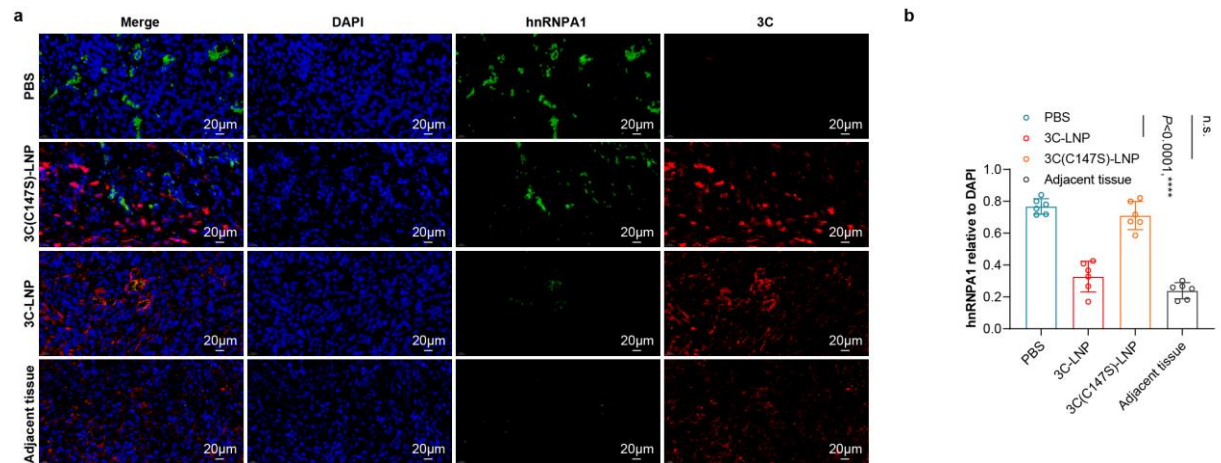

**Supplementary Fig. 10| *In vivo* validation of 3C protein expression effects on hnRNPA1 levels and apoptosis induction in GBM models.** (a) Immunofluorescence staining of tumor and adjacent sections showing the expression of hnRNPA1 (green), 3C protein (red), and cellular nuclei (DAPI, blue). The merge images illustrate co-localization. Scale bars= 20 µm. (b) Quantification of hnRNPA1 expression relative to DAPI. n= 6 independent fields of view. For **a**: a representative image from one of six independent fields of view in a single experiment. The data in **b** is presented as the means ± SD. Statistical differences were assessed using one-way ANOVA with the Bonferroni multiple comparisons test. n.s.=not significant. \*\*\*\* $P < 0.0001$ . Source data are provided as a Source Data file.

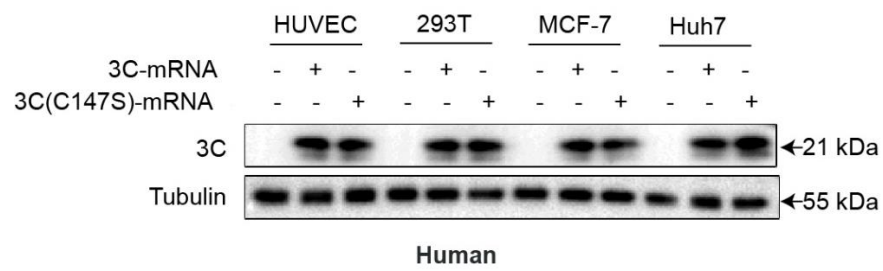

**Supplementary Fig. 11| 3C expression in different human normal and cancer cells.** Representative western blot analysis of 3C expression in HUVEC, 293T, MCF-7 and Huh7 cells transfected with 3C-mRNA and 3C(C147S)-mRNA from 3 independent experiments. Source data are provided as a Source Data file.

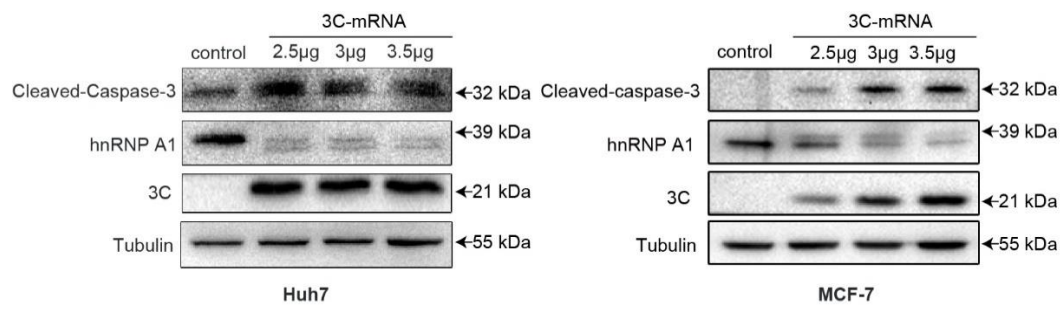

**Supplementary Fig. 12| The expression levels of hnRNPA1 are significantly reduced upon 3C expression in both Huh7 and MCF7 cells.** Representative western blot analysis of Cleaved-caspase-3, hnRNPA1, and 3C expression in Huh7 and MCF-7 cells transfected with different concentrations 3C-mRNA from 3 independent experiments. Source data are provided as a Source Data file.

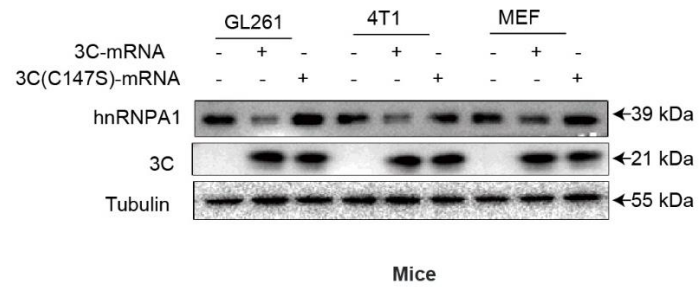

**Supplementary Fig. 13| 3C expression in different mouse normal and cancer cells.** Representative western blot analysis of hnRNPA1 and 3C expression in GL261, 4T1, and MEF cells transfected with 3C-mRNA and 3C(C147S)-mRNA from 3 independent experiments. Source data are provided as a Source Data file.

**Supplementary Table 1. 3C-mRNA has broad-spectrum antitumor activity *in vitro*.** Cell viability was measured using a CellTiter–Glo Cell Viability Assay Kit. The IC<sub>50</sub> was calculated for each cell type using Origin 9.0 software. Therapeutic index (TI)=IC<sub>50</sub> of HUVECs/IC<sub>50</sub> of tumor cells. The data are presented as the means ± SDs. n=3 independent biological samples.

| Cell line      | IC <sub>50</sub> (ng/mL) | Therapeutic index (TI) |
|----------------|--------------------------|------------------------|
| <b>HUVEC</b>   | > 10000                  | -                      |
| <b>U87 MG</b>  | 379.48±51.41             | > 26.35                |
| <b>U138 MG</b> | 342±50.74                | > 29.24                |
| <b>Huh7</b>    | 286.29±48.29             | > 24.99                |
| <b>HepG2</b>   | 400±96.88                | > 24.99                |
| <b>U2OS</b>    | 271.97±10.42             | > 36.77                |
| <b>CHL-1</b>   | 362.42±70.88             | > 27.59                |
| <b>DU145</b>   | 319.28±85.93             | > 31.32                |
| <b>HCT-116</b> | 649.29±116.53            | > 15.40                |
| <b>Hela</b>    | 50.52±11.54              | > 199                  |
| <b>ACHN</b>    | 287.33±94.13             | > 34.80                |
| <b>AGS</b>     | 126.34±48.68             | > 79.15                |
| <b>A549</b>    | 221.99±18.24             | > 45.05                |
| <b>MCF-7</b>   | 654.3±53.35              | > 15.29                |

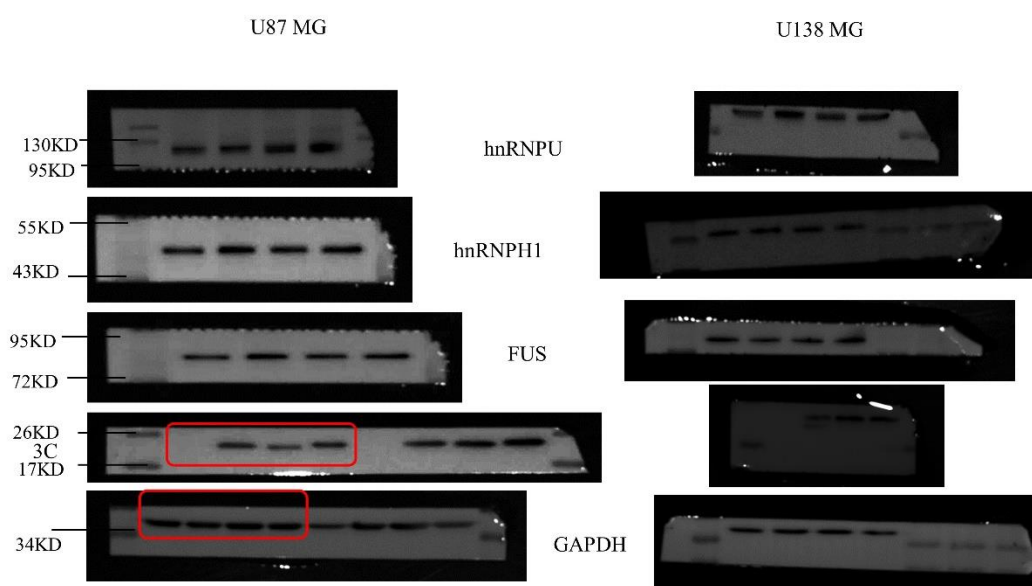

**Supplementary Fig. 14| Original images for Supplementary Figure 7.**

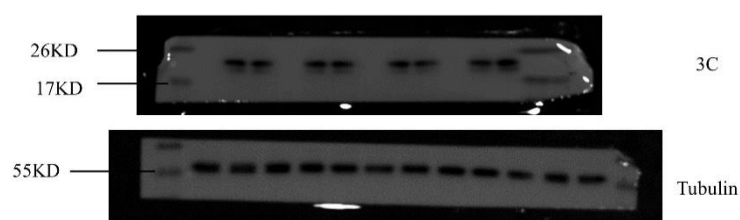

**Supplementary Fig. 15| Original images for Supplementary Figure 11.**



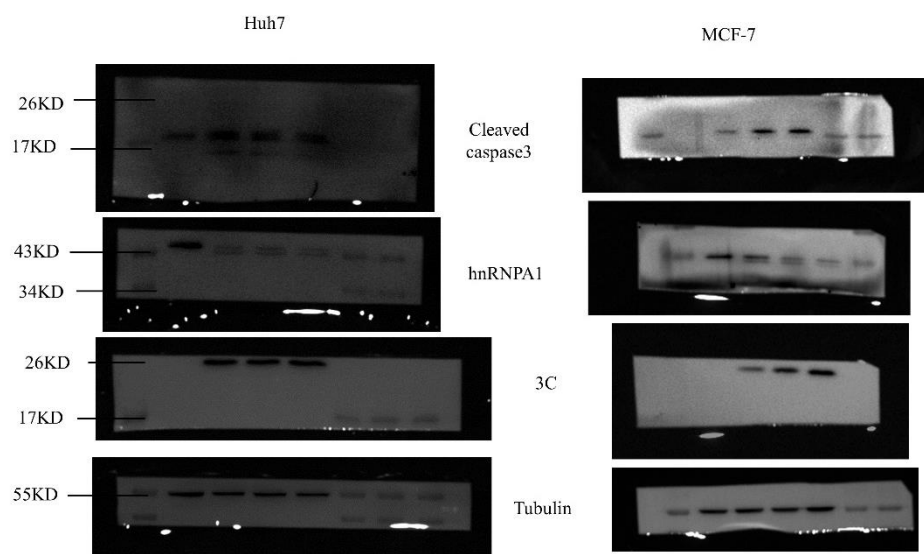

**Supplementary Fig. 16| Original images for Supplementary Figure 12.**

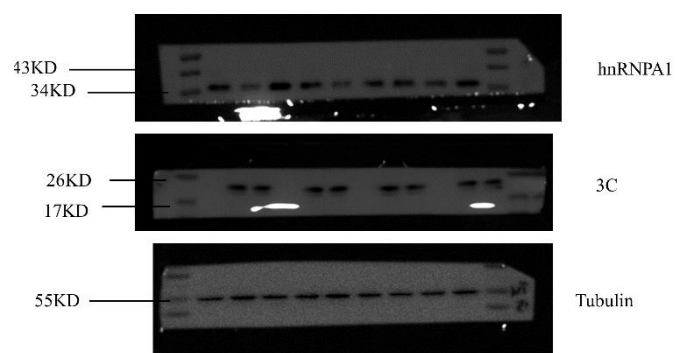

**Supplementary Fig. 17| Original images for Supplementary Figure 13.**
